# Supplementary material for: Nanostructured carbon materials decorated with organophosphorus moieties: synthesis and application
Source: publisher site journal article supplement (doi:10.3762/bjnano.8.52), 2017-02-22
Supplement: Additional file 1 [file 2190-4286-8-52-S1.pdf]

# Supporting information

for

## **Nanostructured carbon materials decorated with organophosphorus moieties: synthesis and application**

Giacomo Biagiotti<sup>1</sup>, Vittoria Langè<sup>1</sup>, Cristina Ligi<sup>1</sup>, Stefano Caporali<sup>2,3</sup>, Maurizio Muniz-Miranda<sup>1</sup>, Anna Flis<sup>4</sup>, K. Michał Pietrusiewicz<sup>4</sup>, Giacomo Ghini<sup>5</sup>, Alberto Brandi<sup>1</sup> and Stefano Cicchi<sup>\*1</sup>

Address: <sup>1</sup>Dipartimento di Chimica Ugo Schiff Università di Firenze, Via della Lastruccia 3–13, 50019 Sesto Fiorentino, Italy, <sup>2</sup>Consorzio Interuniversitario Nazionale per la Scienza e Tecnologia di Materiali INSTM Firenze 50123, Italy, <sup>3</sup>Istituto dei Sistemi Complessi Consiglio Nazionale delle Ricerche Sesto Fiorentino (FI) 50019, Italy, <sup>4</sup>Department of Organic Chemistry Maria Curie-Skłodowska University ul. Gliniana 33, 20-614 Lublin, Poland and <sup>5</sup>Nanesa S.r.l. Via Setteponti 143 – 1, 52100 Arezzo, Italy

Email: Stefano Cicchi - stefano.cicchi@unifi.it

\* Corresponding author

**IR, Raman and XPS spectra, NMR spectra of amides 17, 19 and 21, GC analysis of 17 and 21**

### **XPS Measurements**

The chemical composition of the near surface sample portion was obtained by means of X-ray Photoelectron Spectroscopy (XPS). The experiments were carried out in an ultrahigh vacuum (UHV, 10<sup>-9</sup> mbar) system equipped with a VSW HAC 500 hemispherical electron-

energy analyzer using a non-monochromatic Mg  $K\alpha$  X-ray source operating at 120 W power (10 kV  $\times$  10 mA). The samples were introduced in the UHV system via a loadlock under an inert gas (N<sub>2</sub>) flux. Survey and high-resolution spectra (C1s, O1s, P2p) were acquired in the constant analyzer energy mode (CAE) at pass energy  $E_{pas} = 22$  eV with a step size of 1.0 and 0.1 eV, respectively. The peaks were fitted using CasaXPS software employing Gauss-Lorentz curves after subtraction of a Shirley-type background. Binding Energy (BE) scale was calibrated taking as reference the position of aliphatic C1s component (adventitious carbon) at  $284.8 \pm 0.1$  eV.

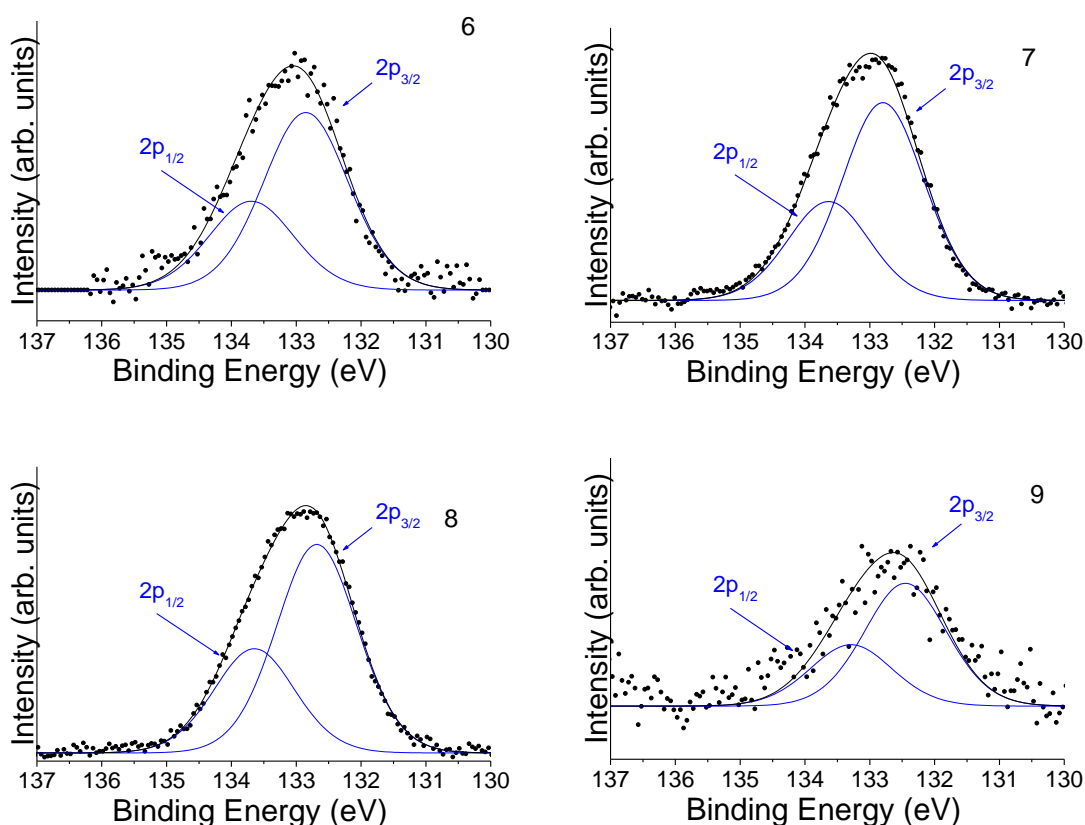

**Figure S1:** XPS spectra of compounds **6**, **7**, **8**, and **9**, all signals are at 132.8 eV.

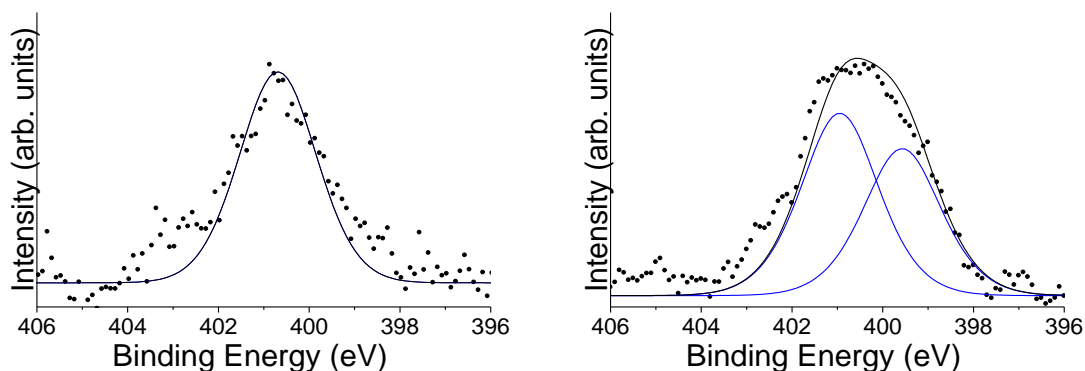

**Figure S2:** XPS spectra of compounds **6** on the left and **7** on the right, the binding energy of 400.7 eV, which evidence the presence of the nitrogen in both samples.

## FT-IR SPECTRA

IR spectra were recorded on a Perkin-Elmer FT-IR 881 or Shimadzu FT-IR 8400s spectrometer. All the spectra were recorded in KBr pellets with a concentration of substances of 1mg in 100 mg and under nitrogen atmosphere to remove the noise.

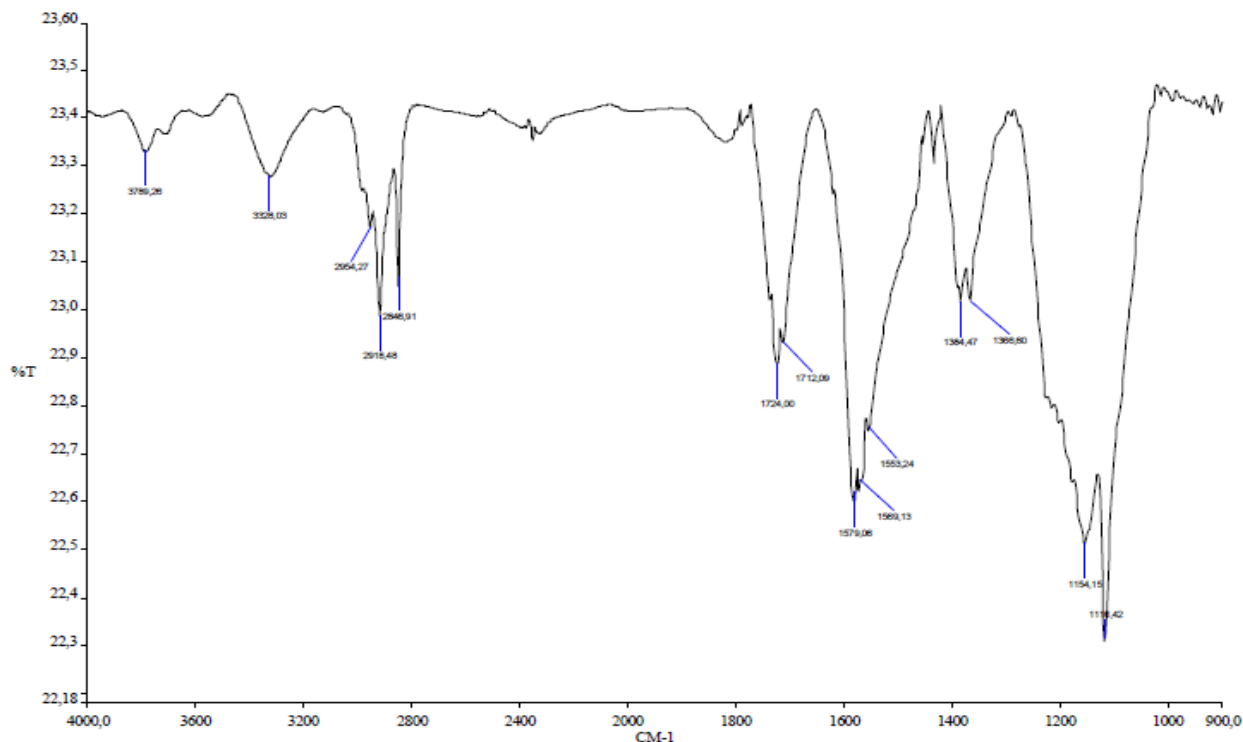

**Figure S3:** FT-IR Spectrum of Ox-MWCNTs-Tour-PO (6).

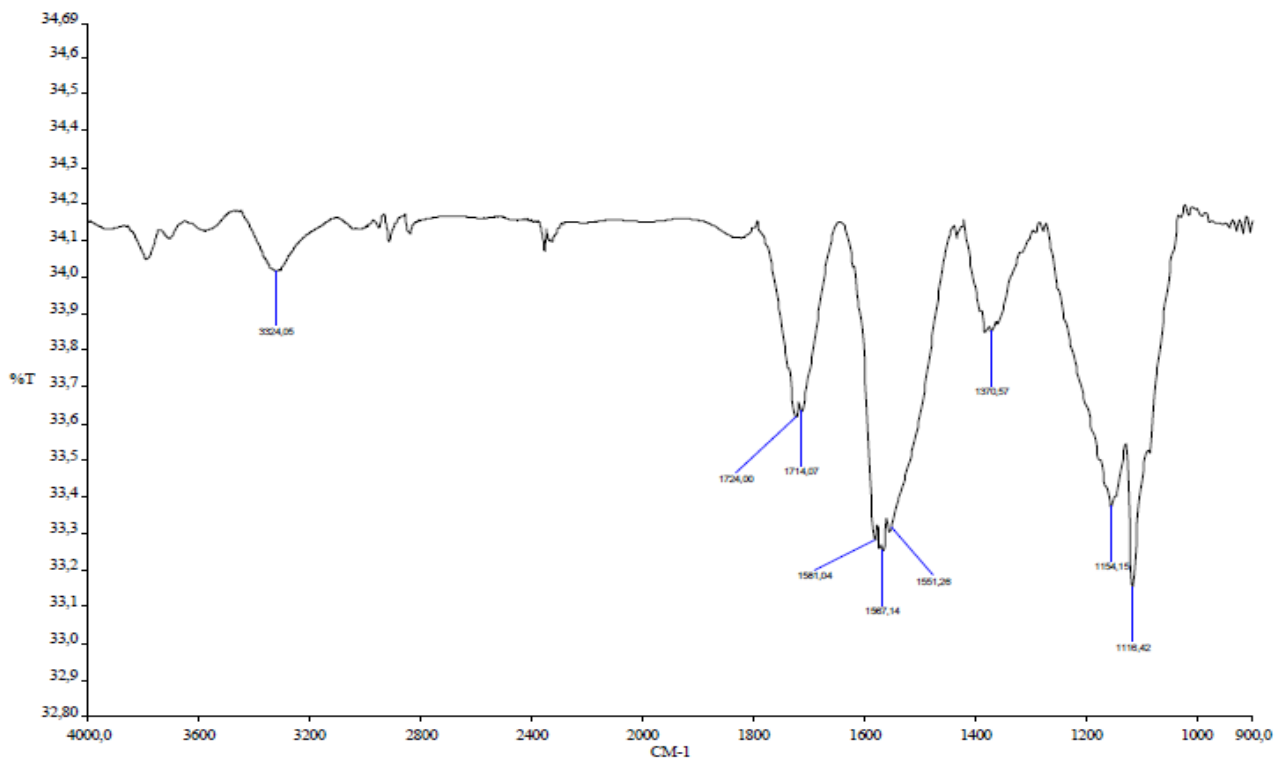

**Figure S4:** FT-IR Spectrum of CNT-Nit-PO (8).

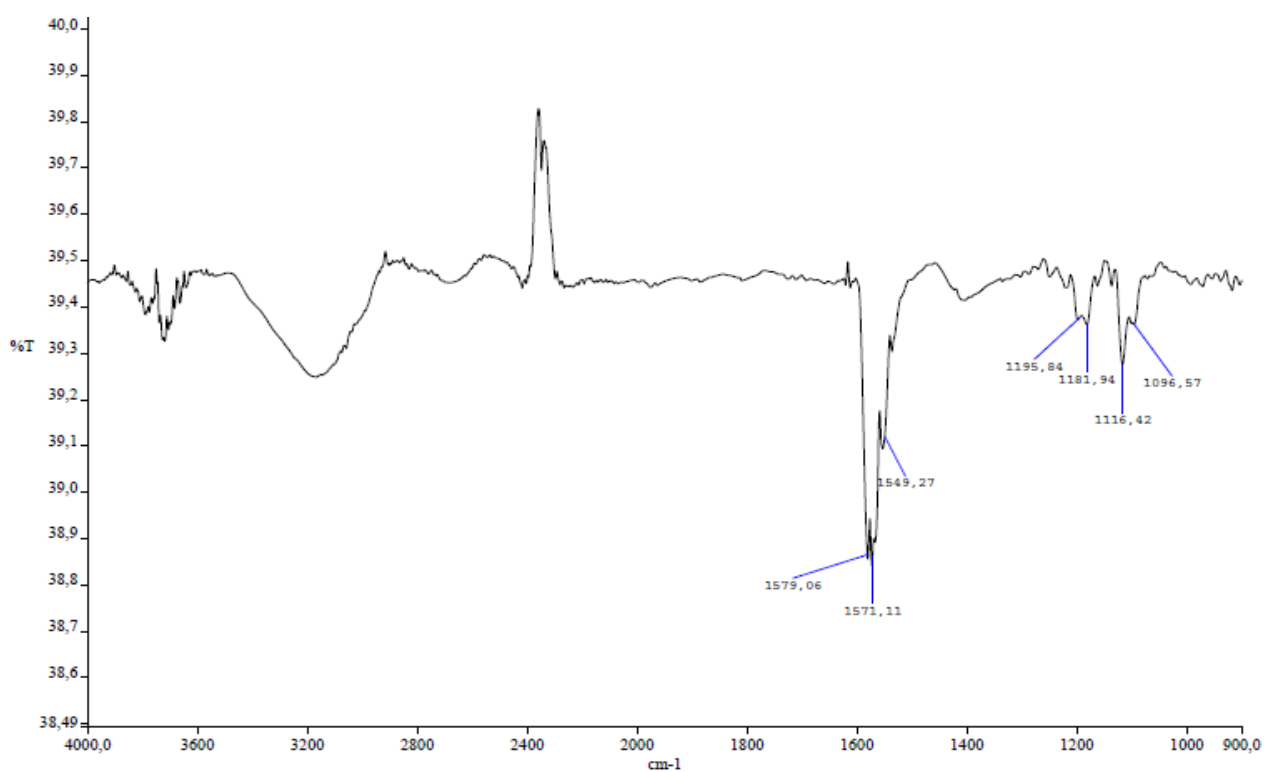

**Figure S5:** FT-IR spectrum GNP-Nit-PO (9).

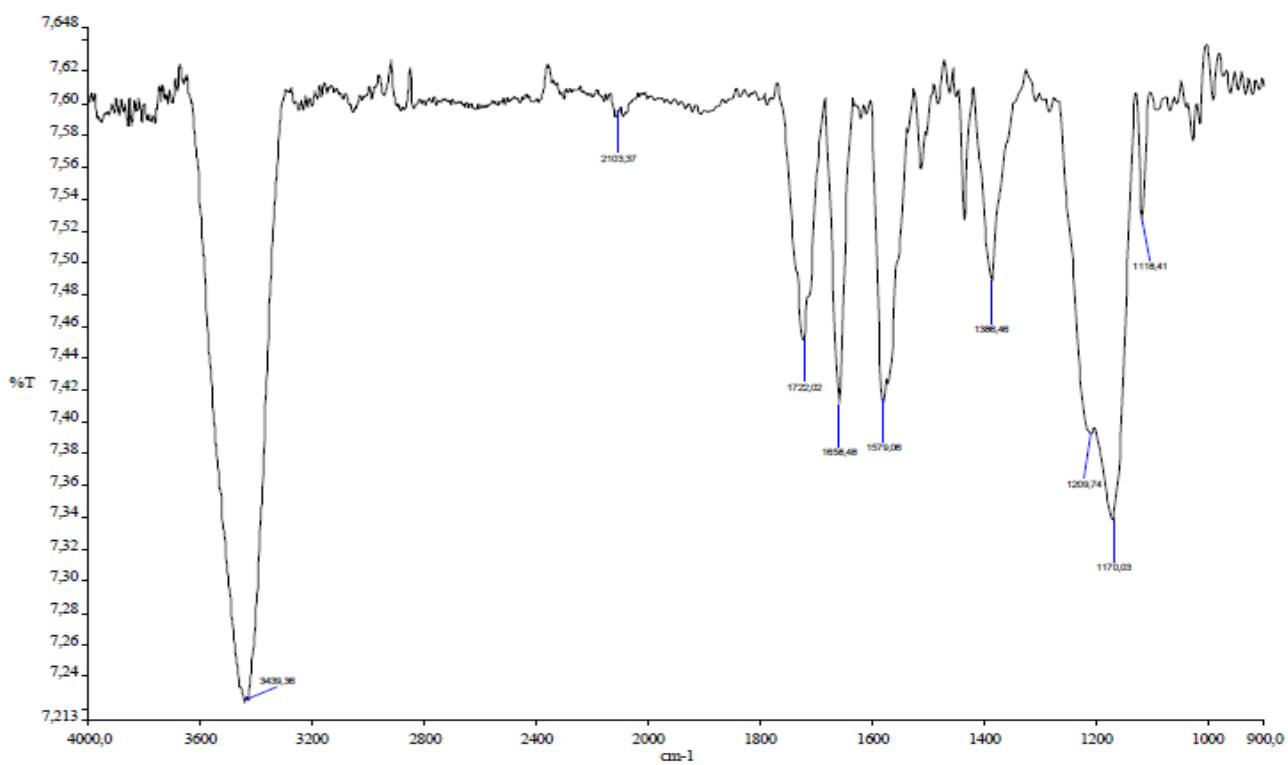

**Figure S6:** FT-IR spectrum OxMWCNTs-Click-PO (13).

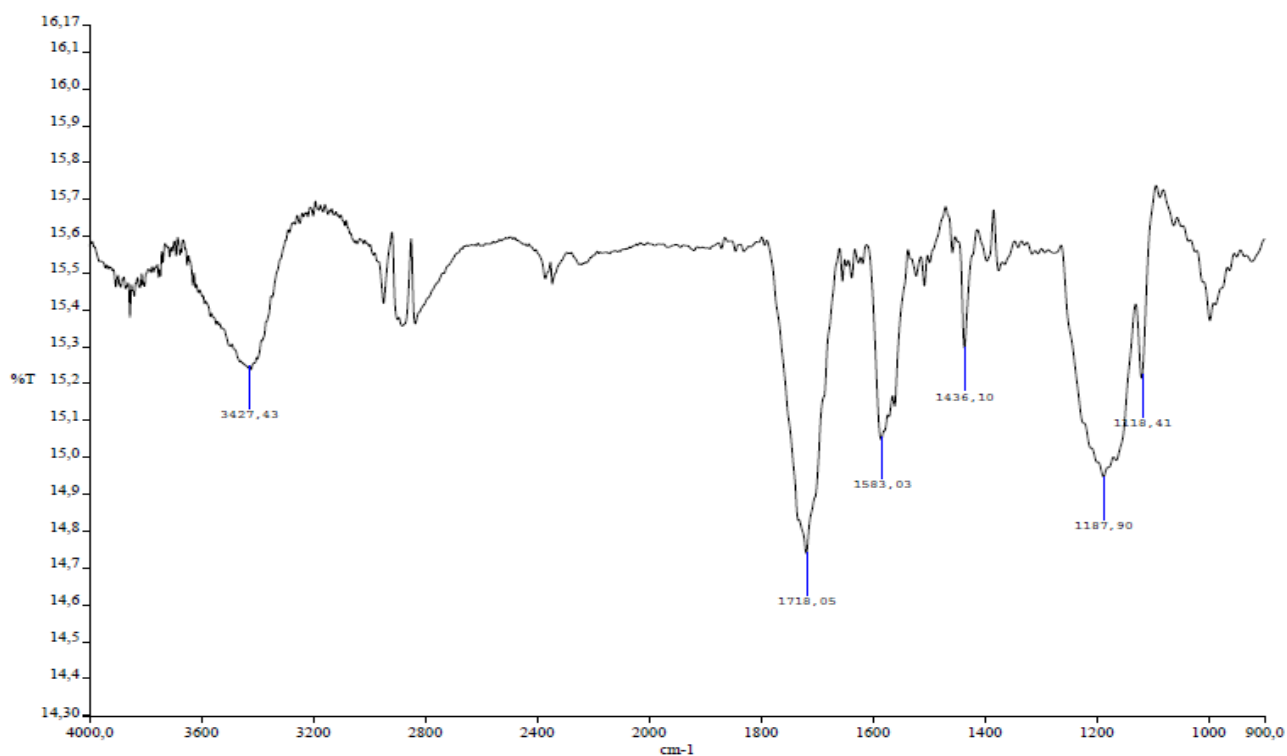

**Figure S7:** FT-IR spectrum OxMWCNTs-Tour-P (6-red).

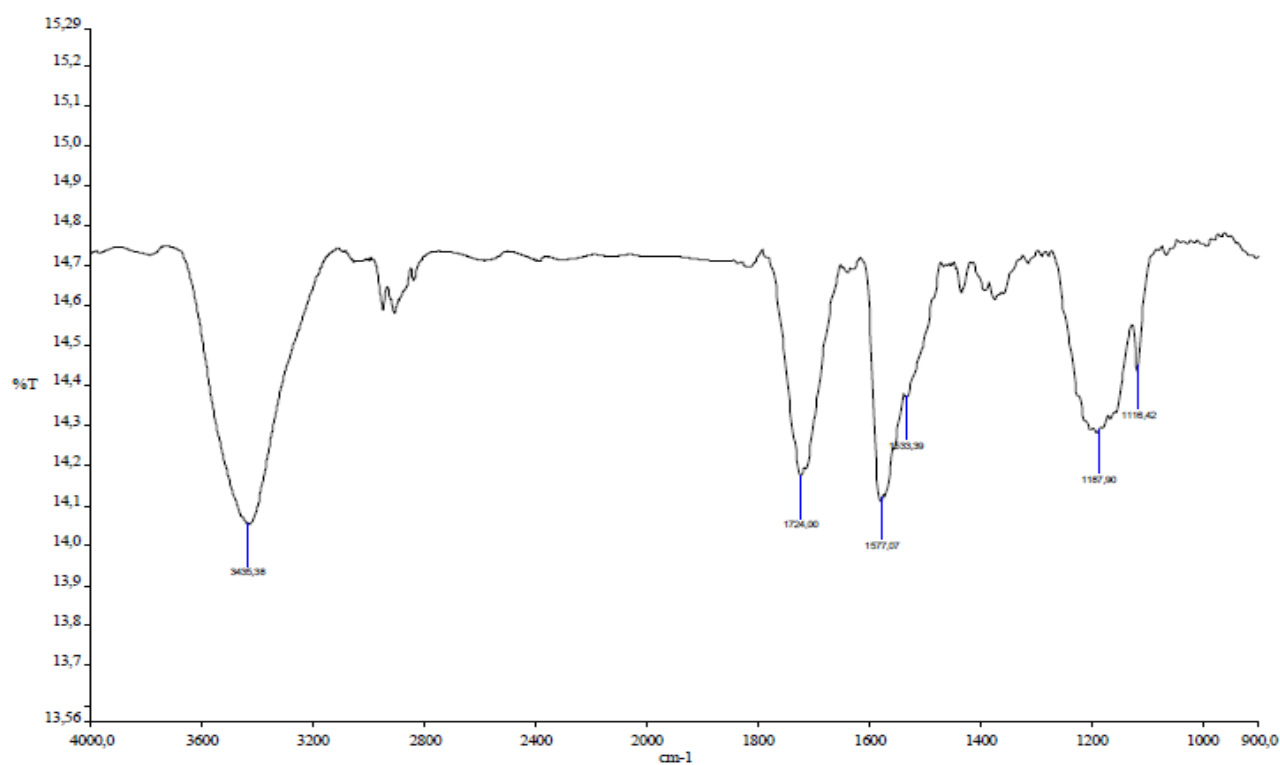

**Figure S8:** FT-IR spectrum OxMWCNTs-Nit-P (8-red).

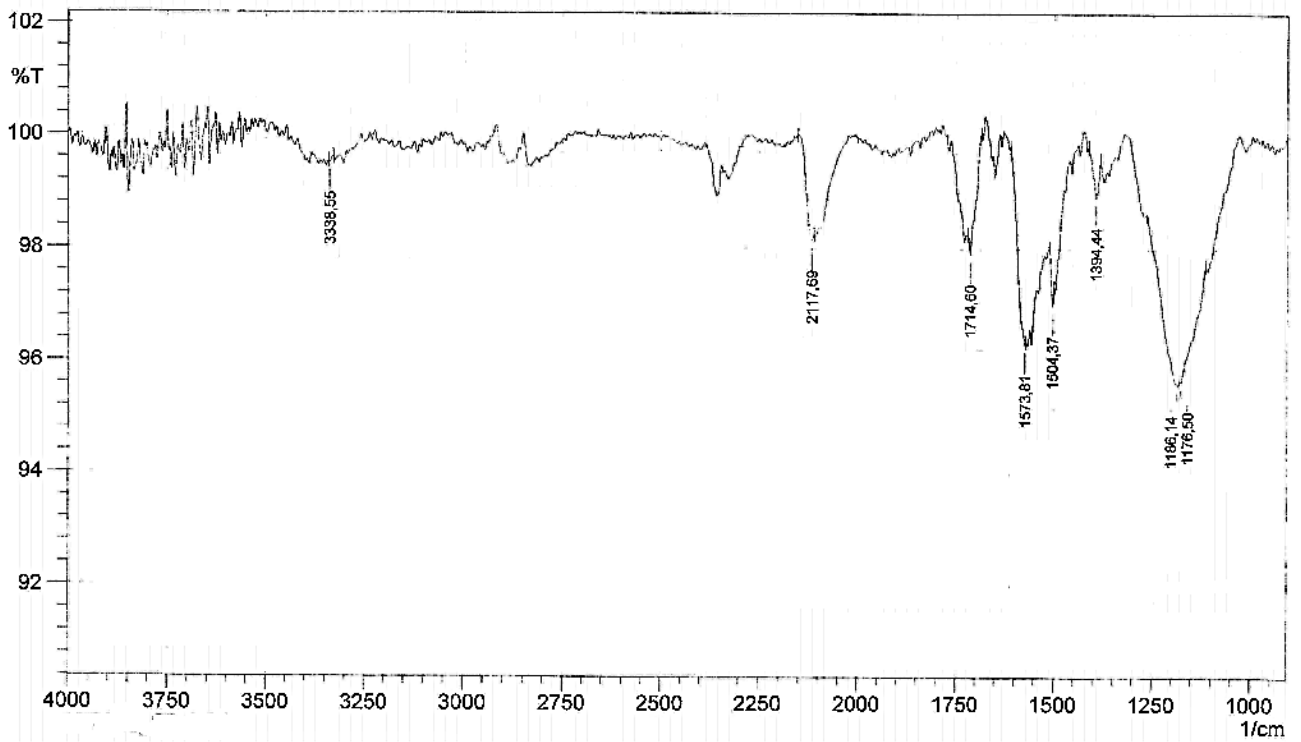

**Figure S9:** FT-IR spectrum OxMWCNTs-N<sub>3</sub> (11).

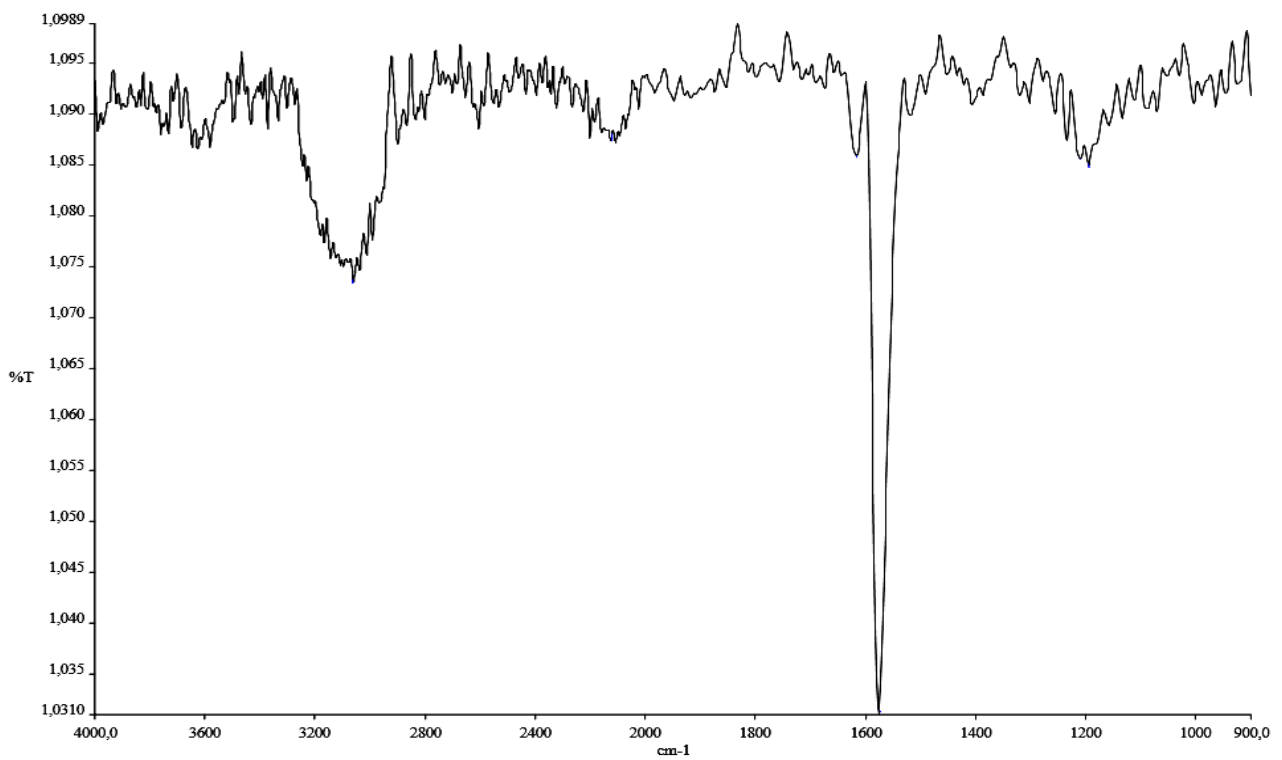

**Figure S10:** FT-IR spectrum GNPs-N<sub>3</sub> (12).

## Raman Measurements

Raman spectra were measured by a Renishaw RM2000 instrument, equipped with a diode laser emitting at 785 nm. Sample irradiation was accomplished by using the 50x microscope objective of a Leica Microscope DMLM. The beam power was ~3mW, and the laser spot size was adjusted between 1 and 3 micrometers. The backscattered Raman signal was fed into the monochromator through 40 micrometer slits and detected by an air-cooled CCD (2.5 cm<sup>-1</sup> per pixel) filtered by a double holographic Notch filters system. Spectra were calibrated with respect to a silicon wafer at 520 cm<sup>-1</sup>.

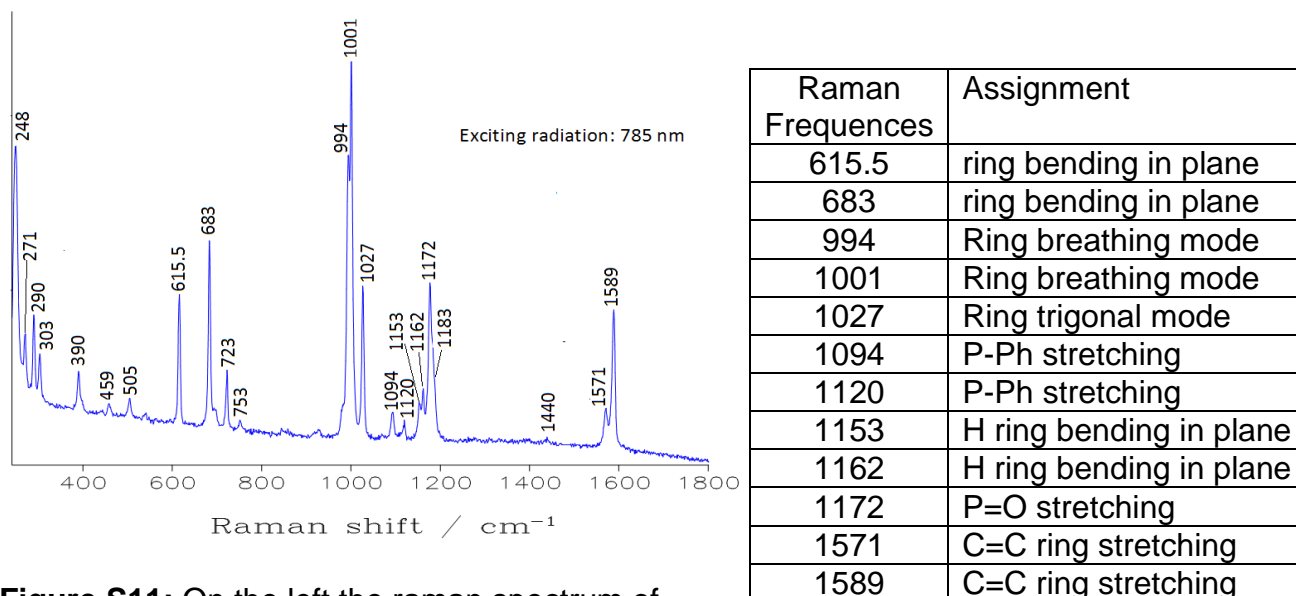

**Figure S11:** On the left the raman spectrum of phosphine oxide 2, on the right the signal assignment.

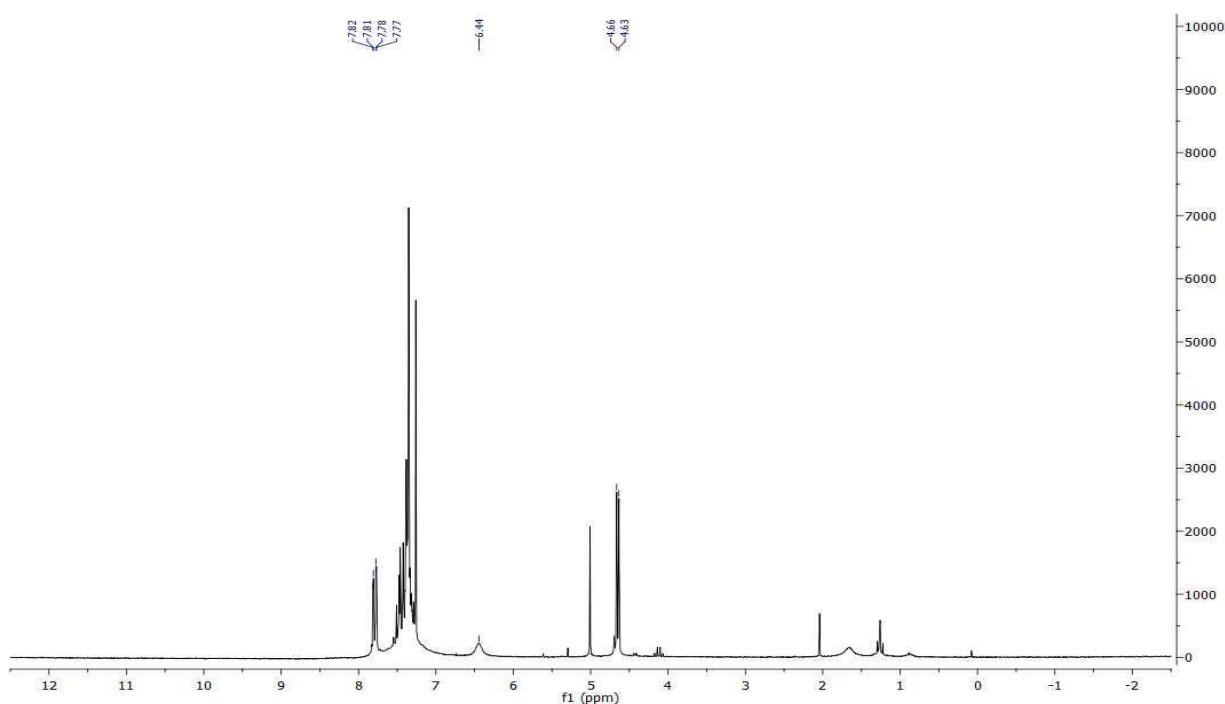

**Figure S12:** <sup>1</sup>H NMR (200 MHz CDCl<sub>3</sub>) of product 17.

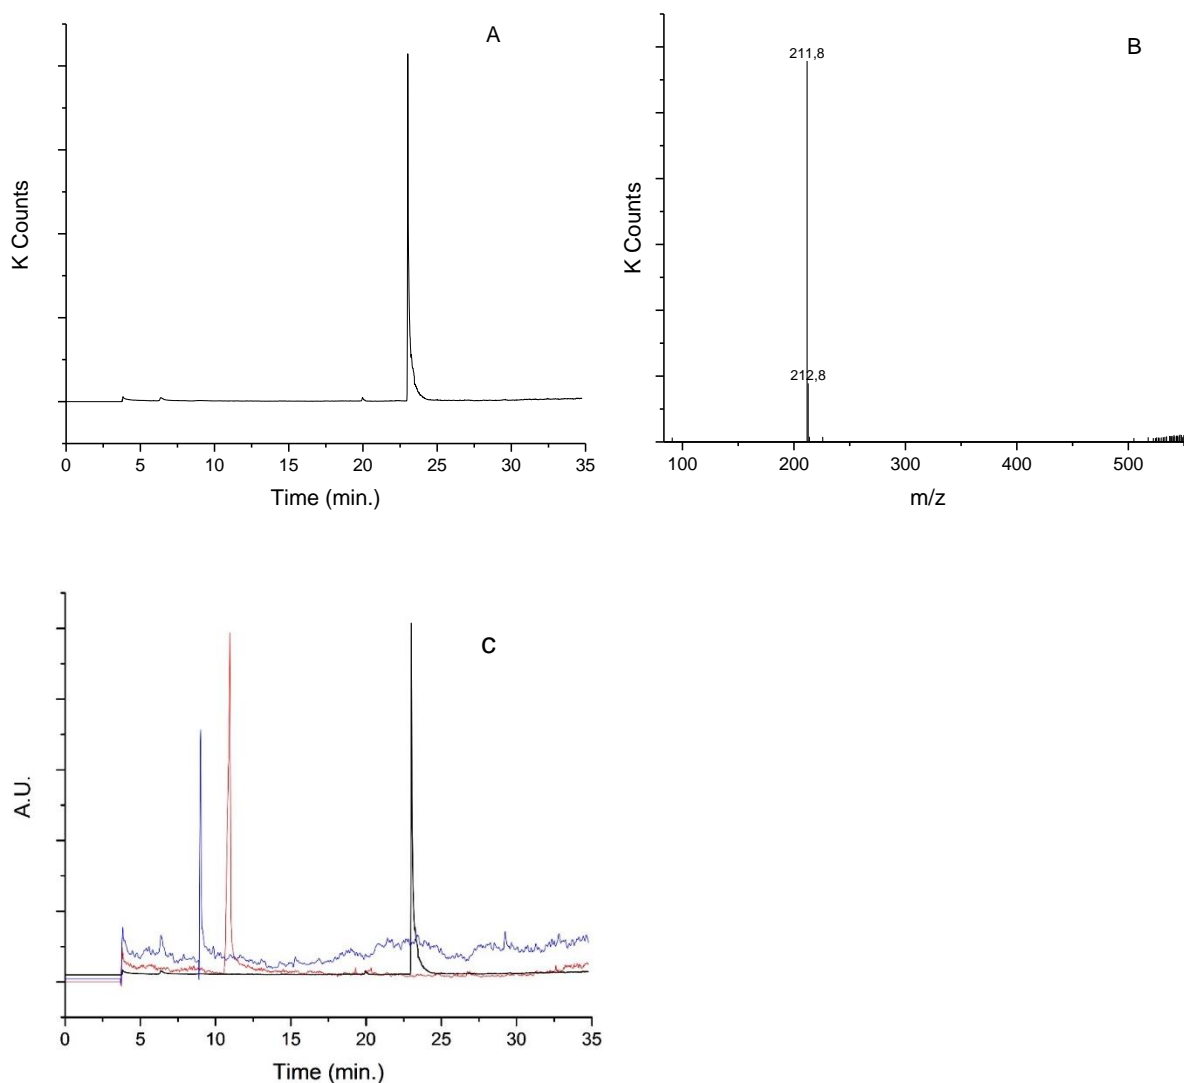

**Figure S13:** GC-MS Spectra of compound **17**: A) Chromatogram of the purified product; B) Mass spectrum with chemical ionization; C) Comparison three different chromatograms: black product **17**, blue benzyl azide and benzoic acid red.



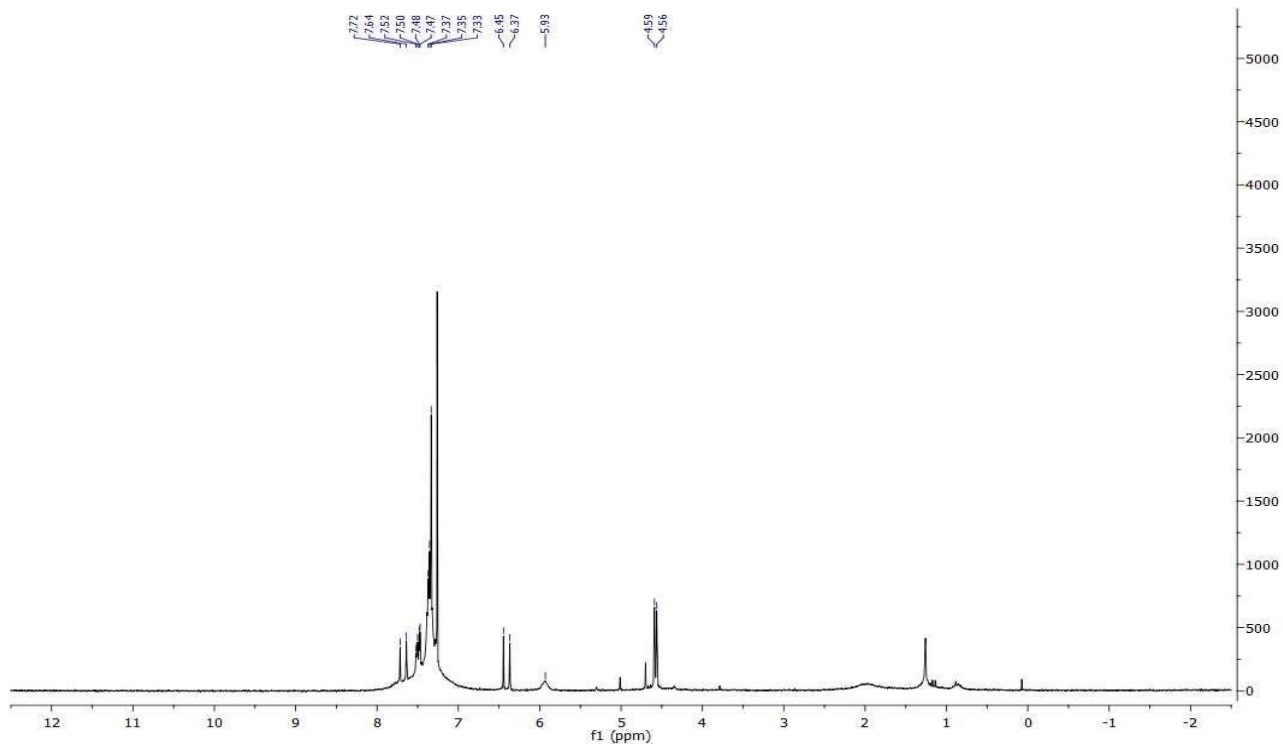

Figure S14:  $^1\text{H}$  NMR (200 MHz  $\text{CDCl}_3$ ) of Product 19.

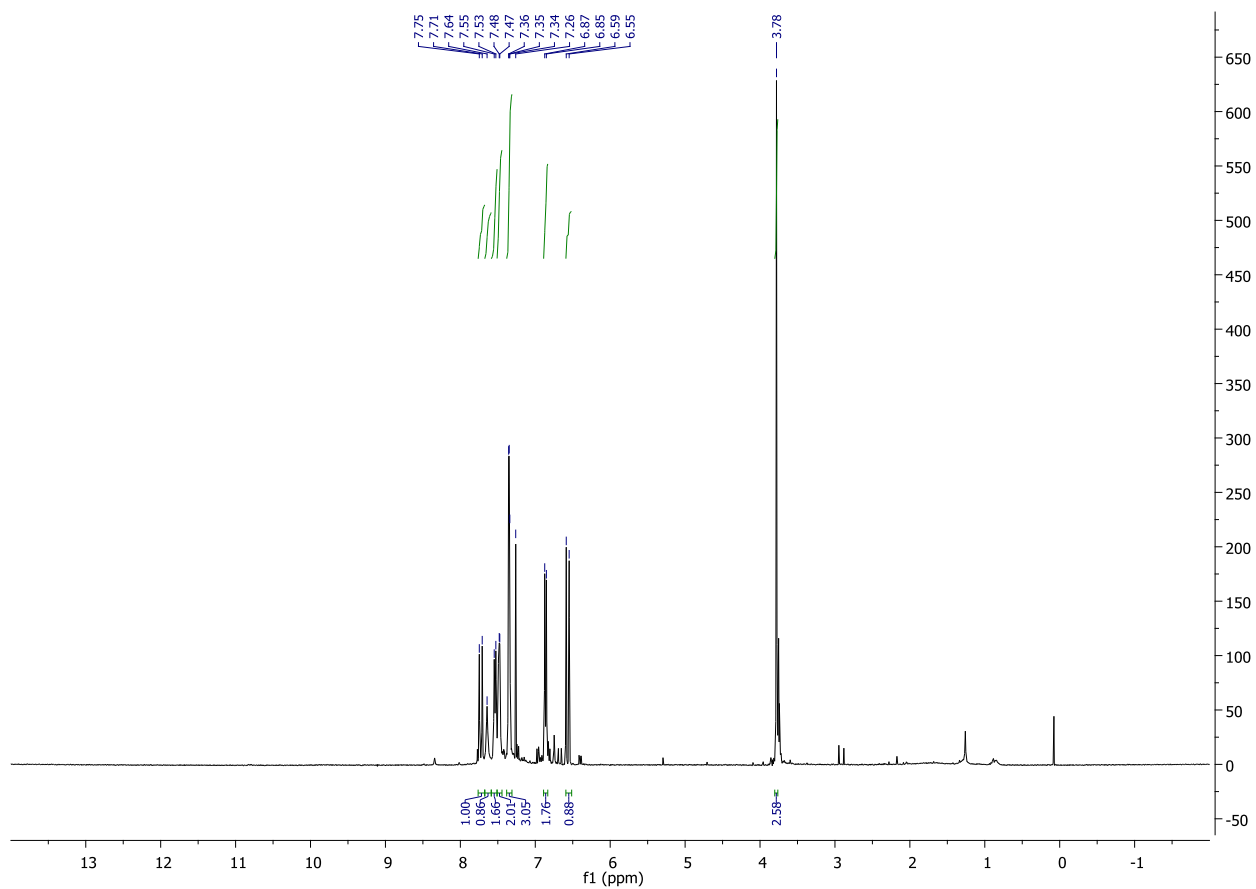

Figure S15:  $^1\text{H}$  NMR (400 MHz  $\text{CDCl}_3$ ) of Product 21.

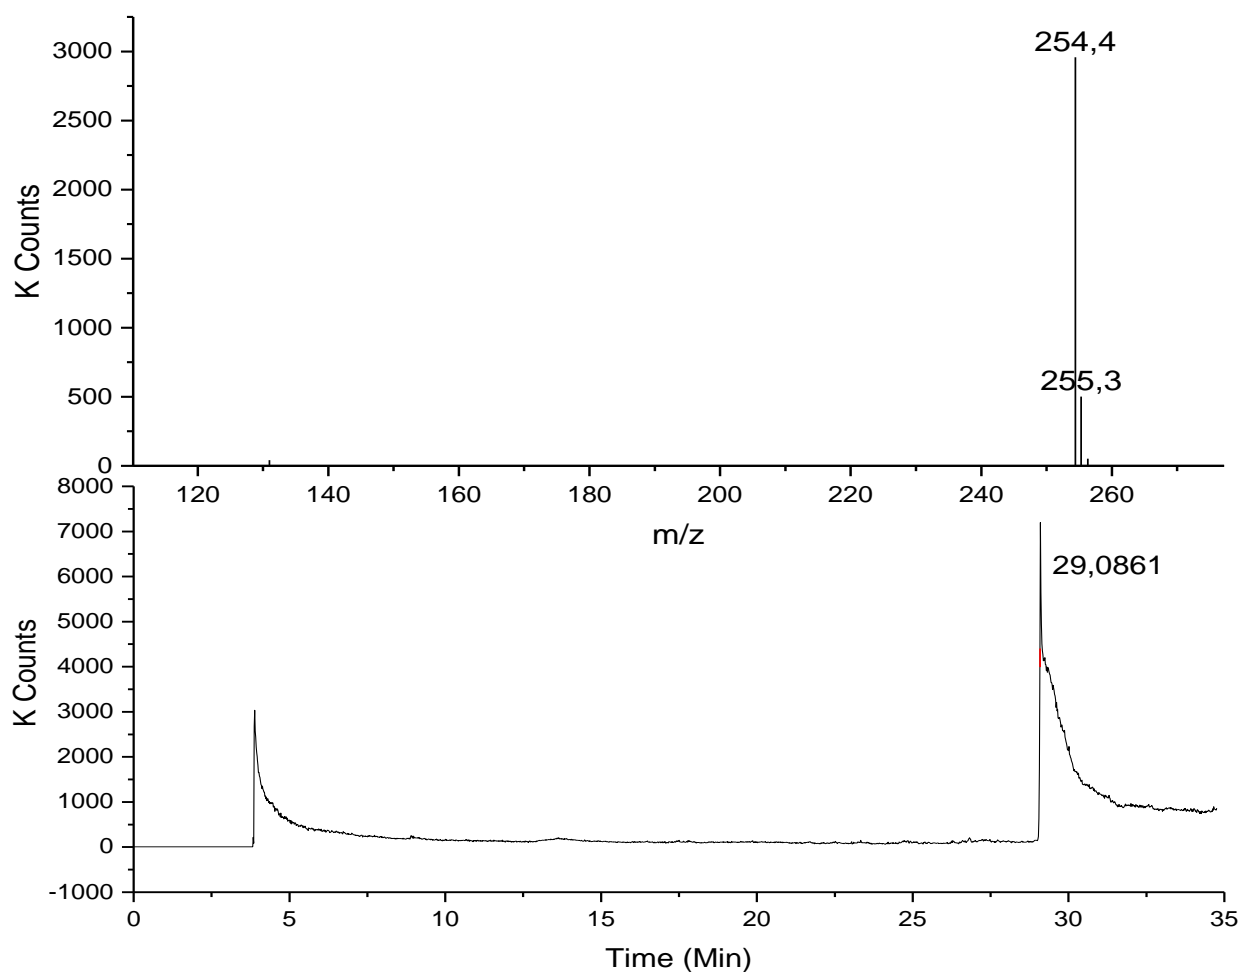

**Figure S16:** GC-MS Spectra of compound **21**: top Mass spectrum with chemical ionization; bottom chromatogram of the purified product.
